# Supplementary figures and images for: Perosomus Elumbis in Piglets: Pathological, Radiological and Cytogenetic Findings
Source: MDPI journal article supplement (doi:10.3390/ani11041132), 2021-04-15

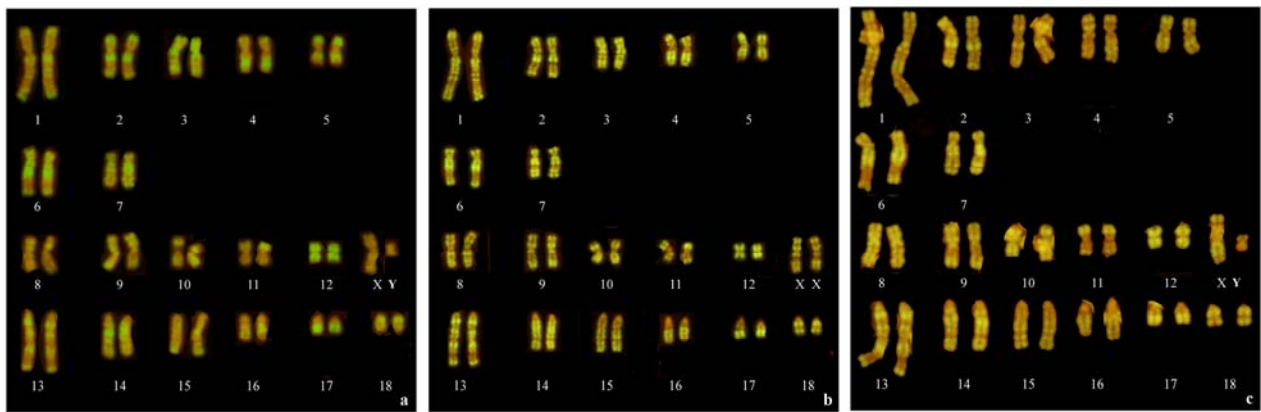

**Supplementary figure:** R-banded Karyotype of a) the affected piglet; b) the sow and c) the boar

Supplement: s1 [file s1]
